# Supplementary material for: Implementation of MISSION–Criminal Justice in a Treatment Court: Preliminary Outcomes Among Individuals With Co-occurring Disorders
Source: Atypon-hosted journal article supplement (doi:10.1176/appi.ps.201800570), 2019-07-24
Supplement: appi.ps.201800570.ds001.pdf [file appi.ps.201800570.ds001.pdf]

## Implementation of MISSION–Criminal Justice in a Treatment Court: Preliminary Outcomes

## Among Individuals With Co-occurring Disorders

Baseline data of 97 justice-involved adults enrolled in a mental health court and MISSION-CJ<sup>a</sup>

| <b>Baseline characteristic</b>                                                                        | <b>n</b> | <b>%</b> | <b>M</b> | <b>SD</b> | <b>Median</b> | <b>Range</b> |
|-------------------------------------------------------------------------------------------------------|----------|----------|----------|-----------|---------------|--------------|
| Male                                                                                                  | 78       | 80.41    |          |           |               |              |
| Female                                                                                                | 19       | 19.59    |          |           |               |              |
| Age (years)                                                                                           |          |          | 34.18    | 10.05     | 33.00         | 19–60        |
| Hispanic/Latino                                                                                       | 48       | 49.48    |          |           |               |              |
| Non-Hispanic/Latino                                                                                   | 49       | 50.52    |          |           |               |              |
| African American                                                                                      | 33       | 36.67    |          |           |               |              |
| Native American                                                                                       | 1        | 1.11     |          |           |               |              |
| Caucasian                                                                                             | 48       | 53.33    |          |           |               |              |
| Two or more races                                                                                     | 8        | 8.89     |          |           |               |              |
| Lifetime arrests                                                                                      |          |          | 12.02    | 11.78     | 8.00          | 1–60         |
| Lifetime months incarcerated                                                                          |          |          | 60.28    | 81.24     | 24.50         | 0–456        |
| Age of first arrest (years)                                                                           |          |          | 17.60    | 6.57      | 16.00         | 8–49         |
| Experienced serious depression for a significant period of lifetime                                   | 84       | 91.30    |          |           |               |              |
| Experienced serious anxiety for a significant period of lifetime                                      | 83       | 91.21    |          |           |               |              |
| Experienced trouble understanding, concentrating, or remembering for a significant period of lifetime | 64       | 69.57    |          |           |               |              |
| Experienced at least one traumatic event                                                              | 65       | 67.71    |          |           |               |              |
| Lifetime years of illegal drug use                                                                    |          |          | 13.94    | 8.63      | 11.00         | 0–40         |

<sup>a</sup>Maintaining Independence and Sobriety through Systems Integration, Outreach, and Networking–Criminal Justice.

**Online Supplement**
